# Supplementary material
Source: PubMed Central journal article supplement (PMC7059097)
Supplement: NIHMS1539125-supplement-1.pdf [file NIHMS1539125-supplement-1.pdf]

| Genes                                                                                                                  | p-value  | q-value    |
|------------------------------------------------------------------------------------------------------------------------|----------|------------|
| NM_000602 // SERPINE1 // serpin peptidase inhibitor, clade E (nexin, plasminogen activator inhibitor type 1), member 1 | 5.74E-05 | 0.26575296 |
| NM_001145125 // MKRN1 // E3 ubiquitin-protein ligase makorin-1                                                         | 3.02E-05 | 0.21302346 |
| NM_003607 // CDC42BPA // CDC42 binding protein kinase alpha (DMPK-like)                                                | 2.74E-05 | 0.21302346 |
| NM_003714 // STC2 // stanniocalcin 2                                                                                   | 8.64E-06 | 0.20322019 |
| NM_004450 // ERH // enhancer of rudimentary homolog (Drosophila)                                                       | 5.60E-05 | 0.26575296 |
| NM_014331 // SLC7A11 // solute carrier family 7 (anionic amino acid transporter light chain, xc- system), member 11    | 1.49E-05 | 0.21302346 |
| NM_018259 // TTC17 // tetratricopeptide repeat domain 17                                                               | 3.51E-05 | 0.21302346 |
| NM_024884 // L2HGDH // L-2-hydroxyglutarate dehydrogenase                                                              | 5.35E-05 | 0.26575296 |
| NM_032876 // AJUBA // ajuba LIM protein                                                                                | 1.82E-05 | 0.21302346 |
| NM_152756 // RICTOR // RPTOR independent companion of MTOR, complex 2                                                  | 3.14E-05 | 0.21302346 |
| NR_029850 // MIR362 // microRNA 362                                                                                    | 1.55E-05 | 0.21302346 |
| NR_037193 // SLC3A2 // solute carrier family 3 (amino acid transporter heavy chain), member 2                          | 2.98E-05 | 0.21302346 |

**Supplemental Table 1. Abbreviations used in Fig.1B. q-value: False discovery rate.**

h-Mkrn1-F- 5'-CTATTGAGTTTGTTTCCTGGG-3'  
h-Mkrn1-R- 5'- TGGAGACACAACAGTTCTC-3'

h-Rictor-F- 5'-GCTTCCTTGTTTCCTAGTTC-3'  
h-Rictor-R- 5'-GTGCTAGTTCACAGATAATGG-3'

h-Gapdh-F- 5'-GGT GGT CTC CTC TGA CTT CAA CA-3'  
h-Gapdh-R- 5'-GTT GCT GTA GCC AAA TTC GTT GT-3'

**Supplemental Table 2. List of qRT-PCR primers:**
